# Supplementary material
Source: PubMed Central journal article supplement (PMC2785683)
Supplement: supp_M109.042036_jbc.M109.042036-1.pdf [file supp_M109.042036_jbc.M109.042036-1.pdf]

Supplementary Table 1. Oligonucleotide probes used for S1 nuclease protection assays.

| Target Gene  | Oligonucleotide                                                                      |
|--------------|--------------------------------------------------------------------------------------|
| <i>ZRT1</i>  | 5' -GGCCACACAGATTGGTGTGGTTAACCCATACGCAACACATAGGGCC<br>CATGGCCACCTGATGCCA-3'          |
| <i>CMD1</i>  | 5' -GGGCAAAGGCTTCTTTGAATTCAGCAATTTGTTCTTCGGTGGAGCC-3'                                |
| <i>ADH1</i>  | 5' -CACCTTTTTGAGTTTCTGGGATAGACATTGTATATGAGATGACC-3'                                  |
| <i>ADH3</i>  | 5' -GGATTGCAATCTAAGAATGTTTCTAGAAAATAGGCCCAAC-3'                                      |
| <i>MET3</i>  | 5' -CCGAAGATTGCGCTTCAGATAACAATTCATTCTTCCCGGT-3'                                      |
| <i>MET14</i> | 5' -CCTGACGCACCTTAGACCTGTTAACCAAATAGTACAGTTAC-3'                                     |
| <i>MET16</i> | 5' -CCATGCAATAATCTCCTGTGGCGTTTCCAGCTTGACCGAC-3'                                      |
| <i>MAE1</i>  | 5' -GGCCATCTTCTTAATGGTGCTGTCCCTTGATGCTGTTGGAA-3'                                     |
| <i>LEU1</i>  | 5' -GCCGGCATTCTTAGGCCTTCGAAAGCTTGTGGAGGAACA-3'                                       |
| <i>BAT1</i>  | 5' -CGGTGAATGTCTGGCCGAACACTAATTCCTTCATTTAACTC-3'                                     |
| <i>BNA1</i>  | 5' -GGCCCACCGACAATCATCACAGTGAATCCCCCTTTGCACG-3'                                      |
| <i>STE3</i>  | 5' -GCCATGTTATCAAAAATGATTGCTGGAATATTCCTTGACGCA-3'                                    |
| <i>UTR2</i>  | 5' -CGGGACATGCTTGAGTTGCATTGCAAAAATGTAGCGATTCT-3'                                     |
| <i>MET30</i> | 5' -GCCCGTAATAAGCAATCTCTTTAATGGTGGCATCATCGCCGTATCTGT<br>CATTTCACTGCTGTTATTGTCGCCG-3' |
| <i>MET4</i>  | 5' -GCGCTTTATTGACGAGAGTCTGTCTAAACAGTTGACGGACAGGCA<br>AGAAGACCTTCAGGAGCCAGT-3'        |

Supplementary Table 2. Oligonucleotide probes used for EMSA experiments.

| ZRE <sup>a</sup>  | Oligonucleotide <sup>b</sup>                                                            |
|-------------------|-----------------------------------------------------------------------------------------|
| <i>TSAI</i> ZRE   | 5' -ggccCTGTTCTGGCCCGTCGGGTTTTCTGACAAA-3'<br>3' -GACAAGACCGGGCAGCCCAAAGACTGTTTagct-5'   |
| <i>TSAI</i> m ZRE | 5' -ggccCTGTTCTGTAAATGATTTGTTTTCTGACAAA-3'<br>3' -GACAAGACATTTACTAAACAAAGACTGTTTagct-5' |
| <i>MET30</i> ZRE  | 5' -ggccGGAGAGATAACTGCAGGGTGTGGCACGGCA-3'<br>3' -CCTCTCTATTGACGTCCCACACCGTGCCGTagct-5'  |

<sup>a</sup>*TSAI* mZRE1 is mutated such that each position in the wild type *TSAI* ZRE1 was altered by a transversion mutation.

<sup>b</sup>The potential ZREs (or the mutated region in *TSAI* mZRE1) in each complementary oligonucleotide pair are indicated by the line. The lower case letters indicate *EagI*- and *SalI*-complementary overhangs included for cloning these fragments into a *lacZ* reporter plasmid for future studies.

Supplementary Table 3. Chromatographic conditions used for amino acid analysis.

|   | Time  | Flow<br>(ml/min) | %A   | %B   | %C1   | %D   | Curve |
|---|-------|------------------|------|------|-------|------|-------|
| 1 |       | 1.0              | 0.0  | 0.0  | 100.0 | 0.0  |       |
| 2 | 0.50  | 1.0              | 0.0  | 0.0  | 100.0 | 0.0  | 11    |
| 3 | 22.50 | 1.0              | 0.0  | 3.5  | 96.5  | 0.0  | 6     |
| 4 | 40.12 | 1.0              | 0.0  | 3.5  | 26.5  | 70.0 | 6     |
| 5 | 46.00 | 1.0              | 0.0  | 5.0  | 95.0  | 0.0  | 6     |
| 6 | 48.00 | 1.0              | 0.0  | 9.0  | 91.0  | 0.0  | 6     |
| 7 | 66.00 | 1.0              | 0.0  | 17.0 | 83.0  | 0.0  | 6     |
| 8 | 80.00 | 1.0              | 40.0 | 60.0 | 0.0   | 0.0  | 6     |
| 9 | 86.00 | 1.0              | 0.0  | 0.0  | 100.0 | 0.0  | 6     |

Chromatographic conditions developed in-house, with eluent C1 adopted from Cohen and Michaud (Anal Biochem. 211:279-87, 1993).
